# Supplementary material
Source: ML conference proceedings conference paper supplement (https://openreview.net/forum?id=O9Vuj6lzya)
Supplement: supplementary_material [file attachment]

# Supplementary Materials: Holistic-CAM: Ultra-lucid and Sanity Preserving Visual Interpretation in Holistic Stage of CNNs

Anonymous Authors

## A APPENDIX

### A.1 Ablation Study on fundamental scale denoising

During *fundamental scale denoising* phase, we utilize two filters to identify the fundamental location region. Now, we conduct experiments to evaluate the contribution of the inner component *median\_blur2d* and *mean\_blur2d* in *low-pass wrap* (LPW). In addition, we also conduct experiments on the hyper-parameters *blurSize* and *ksize*.

**Table 1: Ablation study on denoising components.** “D” represents median filter and “I” represents mean filter. The best result for each metric are shown in underline **bold**, and the second one is shown with underline.

|        | D            | I            | Ins $\uparrow$ | Del $\downarrow$ | Over-all $\uparrow$ | EPG $\uparrow$ |
|--------|--------------|--------------|----------------|------------------|---------------------|----------------|
| Layer4 | $\times$     | $\times$     | 53.399         | 8.881            | 44.518              | <u>57.144</u>  |
|        | $\checkmark$ | $\times$     | 54.728         | 9.272            | 45.456              | 53.811         |
|        | $\times$     | $\checkmark$ | 53.677         | 8.841            | <u>44.796</u>       | 56.748         |
|        | $\checkmark$ | $\checkmark$ | 55.099         | 9.067            | <b>46.032</b>       | <u>57.102</u>  |
| Layer2 | $\times$     | $\times$     | 49.067         | 8.841            | 40.226              | <u>54.957</u>  |
|        | $\checkmark$ | $\times$     | 52.942         | 10.528           | 42.414              | 54.873         |
|        | $\times$     | $\checkmark$ | 53.689         | 10.944           | <u>42.716</u>       | 54.603         |
|        | $\checkmark$ | $\checkmark$ | 53.878         | 10.904           | <b>42.975</b>       | <u>55.577</u>  |

**Study on the components.** As presented in Tab. 1, there is a evident drop in *Ins* and *Over-all* while removing the median filter and mean filter. This is mainly attributed to the narrow positioning region of basic scale mask with the damage of boundary details. In regard to its high performance in positioning ability (i. e. *EPG*), we believe that this mainly associated to the concentrated prominent information which coincides with the flaw of the *EPG* metric. It solely evaluates the first 100 points but ignores other useful information at the edge. In addition, the introduction of *median\_blur2d* aims to prevent the omission of boundary information, and the corresponding performance in *Over-all* certainly confirms this contribution. However, its processing of expanding the edge region is very rough, sometimes even damaging the original edge information, finally leads to a slight decrease in localization ability.

Following the introduction of the *mean\_filter* and *median\_filter* simultaneously, LPW generates a smoother mask that is capable of seeking a balance between preserving the internal information and edge contour details after integrating it with the fused mask. This aligns with the improvement in *Over-all* and *EPG* scores. The marginal increase in *Del* is mainly attributed to the ability to emphasize more significant areas of LPW, it sometimes leads the *Del* metric to remove superior but not the best features. Nevertheless, the performance of *Ins* still reached the peak.

**Study on the hyper-parameters.** We conduct experiment on the hyper-parameters of LPW. Detailed result on Layer4 and Layer2 of ResNet-50 can be indicated in the Tab. 2, Tab. 3, Tab. 4 and Tab. 5. In our analysis, we thoroughly evaluate the holistic fidelity of each interpretation and localization ability, and opt for the *blurSize* of 51, the *ksize* of (91, 91) based on these considerations.

**Table 2: Study on the hyper-parameters of *low-pass wrap*. Over-all of Layer4, higher is better.** The best result for each metric are shown in underline **bold**, and the second one is shown with underline.

| $\begin{matrix} \text{blurSize} \\ \text{ksize} \end{matrix}$ | 31     | 51            | 71            | 91     | 111    | 131    |
|---------------------------------------------------------------|--------|---------------|---------------|--------|--------|--------|
| (31, 31)                                                      | 44.695 | 45.048        | 45.407        | 45.628 | 44.021 | 44.003 |
| (51, 51)                                                      | 45.378 | 45.576        | 45.791        | 45.891 | 43.993 | 43.852 |
| (71, 71)                                                      | 45.879 | 46.014        | <u>46.092</u> | 46.084 | 43.853 | 43.723 |
| (91, 91)                                                      | 46.278 | <b>46.290</b> | 46.284        | 46.234 | 43.993 | 44.723 |
| (111, 111)                                                    | 44.021 | 43.993        | 43.778        | 43.772 | 43.385 | 43.778 |
| (131, 131)                                                    | 43.993 | 43.852        | 44.034        | 43.908 | 43.766 | 44.037 |

**Table 3: Study on the hyper-parameters of *low-pass wrap*. Over-all of Layer2, higher is better.**

| $\begin{matrix} \text{blurSize} \\ \text{ksize} \end{matrix}$ | 31     | 51            | 71     | 91     | 111    | 131    |
|---------------------------------------------------------------|--------|---------------|--------|--------|--------|--------|
| (31, 31)                                                      | 43.201 | 43.486        | 43.497 | 43.462 | 43.231 | 42.978 |
| (51, 51)                                                      | 43.637 | 43.701        | 43.629 | 43.351 | 43.041 | 43.013 |
| (71, 71)                                                      | 43.812 | <u>43.833</u> | 43.678 | 43.554 | 42.873 | 42.931 |
| (91, 91)                                                      | 43.822 | <b>43.842</b> | 43.745 | 43.223 | 42.764 | 42.891 |
| (111, 111)                                                    | 43.722 | 43.721        | 43.367 | 43.123 | 42.794 | 42.988 |
| (131, 131)                                                    | 43.612 | 43.632        | 43.382 | 43.116 | 42.668 | 42.762 |

**Table 4: Study on the hyper-parameters of *low-pass wrap*. EPG of Layer4, higher is better.**

| $\begin{matrix} \text{blurSize} \\ \text{ksize} \end{matrix}$ | 31     | 51            | 71     | 91     | 111    | 131    |
|---------------------------------------------------------------|--------|---------------|--------|--------|--------|--------|
| (31, 31)                                                      | 56.805 | <u>56.906</u> | 56.888 | 56.453 | 56.491 | 56.411 |
| (51, 51)                                                      | 56.755 | 56.832        | 56.876 | 56.871 | 56.698 | 56.637 |
| (71, 71)                                                      | 56.589 | 56.664        | 56.753 | 56.698 | 56.696 | 56.851 |
| (91, 91)                                                      | 56.690 | <b>56.934</b> | 56.417 | 56.583 | 56.587 | 56.857 |
| (111, 111)                                                    | 55.876 | 55.911        | 55.978 | 56.094 | 56.081 | 56.458 |
| (131, 131)                                                    | 55.381 | 55.406        | 55.455 | 55.553 | 55.514 | 55.961 |

**Table 5: Study on the hyper-parameters of *low-pass wrap*. EPG of Layer2, higher is better.**

| $\begin{matrix} \text{blurSize} \\ \text{ksize} \end{matrix}$ | 31     | 51            | 71     | 91     | 111    | 131    |
|---------------------------------------------------------------|--------|---------------|--------|--------|--------|--------|
| (31, 31)                                                      | 56.906 | <b>56.957</b> | 55.739 | 55.294 | 54.605 | 53.682 |
| (51, 51)                                                      | 56.832 | <u>56.836</u> | 56.571 | 55.112 | 54.443 | 53.546 |
| (71, 71)                                                      | 56.645 | 56.519        | 55.254 | 54.810 | 54.159 | 53.314 |
| (91, 91)                                                      | 56.334 | 55.004        | 54.757 | 54.451 | 55.327 | 52.989 |
| (111, 111)                                                    | 55.911 | 55.357        | 54.127 | 53.766 | 53.257 | 52.576 |
| (131, 131)                                                    | 55.406 | 54.631        | 53.425 | 53.105 | 53.666 | 52.961 |

A.2 Detailed Quantitative Experiment Results.

Detailed quantitative results can be referenced at Tab. 6.

**Table 6: Detailed Quantitative Experiment Results** on ResNet-50 and VGG-16. Layer4 to Layer1 represent the four bottleneck layers of ResNet-50 from deep to shallow, respectively. Layer43 to Layer3 represent the five max-pooling layers of VGG-16 from deep to shallow. The best results for each metric are shown in underline bold as well as dyed in **red**, and the second one is shown with underline and colored in **blue**.

| ResNet-50 |                     |               |              |               |               |               | VGG-16  |                     |               |              |               |               |               |
|-----------|---------------------|---------------|--------------|---------------|---------------|---------------|---------|---------------------|---------------|--------------|---------------|---------------|---------------|
| Method    |                     | Ins ↑         | Del ↓        | Over-all ↑    | ROAD ↑        | EPG ↑         | Method  |                     | Ins ↑         | Del ↓        | Over-all ↑    | ROAD ↑        | EPG ↑         |
| Layer4    | Grad-CAM            | 54.887        | 11.622       | 43.265        | 28.095        | <u>53.673</u> | Layer43 | Grad-CAM            | 48.390        | 10.894       | 37.496        | 25.851        | 49.730        |
|           | Grad-CAM++          | 51.165        | 14.172       | 36.993        | 22.470        | 51.424        |         | Grad-CAM++          | 45.044        | 12.528       | 32.516        | 22.331        | <u>52.428</u> |
|           | XGrad-CAM           | 54.887        | 11.622       | 43.265        | 28.099        | 53.673        |         | XGrad-CAM           | 49.029        | 10.761       | 38.268        | 26.223        | 49.288        |
|           | Eigen-CAM           | 53.249        | 12.705       | 40.544        | 25.595        | 53.167        |         | Eigen-CAM           | 48.925        | 10.547       | 38.378        | 25.765        | 52.305        |
|           | Layer-CAM           | 54.018        | 11.882       | 42.136        | 26.799        | 52.963        |         | Layer-CAM           | 48.125        | 10.444       | 37.681        | 26.002        | 51.433        |
|           | CAMERAS             | 54.439        | <b>8.698</b> | <u>45.741</u> | <u>28.606</u> | 52.931        |         | CAMERAS             | 44.548        | <u>9.091</u> | 35.457        | <u>26.153</u> | 50.008        |
|           | Relevance-CAM       | 54.663        | 11.622       | 43.041        | 27.981        | 52.989        |         | Relevance-CAM       | <u>49.296</u> | 10.043       | <u>39.253</u> | 25.98         | 50.894        |
|           | <b>Holistic-CAM</b> | <b>55.056</b> | <b>8.947</b> | <b>46.109</b> | <b>29.047</b> | <b>57.635</b> |         | <b>Holistic-CAM</b> | <b>49.569</b> | <b>8.792</b> | <b>40.777</b> | <b>26.345</b> | <b>55.090</b> |
| Layer3    | Grad-CAM            | 30.622        | 15.752       | 14.870        | 12.312        | 44.078        | Layer33 | Grad-CAM            | 18.575        | 20.033       | -1.458        | -0.835        | 38.102        |
|           | Grad-CAM++          | 32.827        | 15.011       | 17.816        | 13.691        | 45.752        |         | Grad-CAM++          | 31.451        | 12.769       | 18.682        | 13.815        | 44.281        |
|           | Layer-CAM           | 49.364        | <b>8.338</b> | 41.026        | 27.707        | 54.271        |         | Layer-CAM           | 45.242        | <b>7.699</b> | 37.543        | 26.209        | 51.501        |
|           | XGrad-CAM           | 28.775        | 14.832       | 13.943        | 13.676        | 46.972        |         | XGrad-CAM           | 32.523        | 9.162        | 23.361        | 19.099        | 43.814        |
|           | Eigen-CAM           | 50.731        | <u>9.132</u> | <u>41.599</u> | 27.526        | <u>55.215</u> |         | Eigen-CAM           | <u>46.541</u> | <u>8.173</u> | <u>38.368</u> | 26.204        | <u>52.134</u> |
|           | CAMERAS             | 49.483        | 7.569        | 41.914        | 27.879        | 53.127        |         | CAMERAS             | 43.684        | 8.331        | 35.353        | <u>26.383</u> | 51.882        |
|           | Relevance-CAM       | 53.419        | 9.284        | 44.135        | <b>28.631</b> | 48.664        |         | Relevance-CAM       | 42.494        | 8.685        | 33.809        | 23.464        | 47.296        |
|           | <b>Holistic-CAM</b> | <b>54.823</b> | 9.923        | <b>44.900</b> | <u>28.268</u> | <b>58.311</b> |         | <b>Holistic-CAM</b> | <b>47.231</b> | 8.292        | <b>38.939</b> | <b>26.504</b> | <b>57.616</b> |
| Layer2    | Grad-CAM            | 18.876        | 15.207       | 3.669         | 4.673         | 45.171        | Layer23 | Grad-CAM            | 11.226        | 14.503       | -3.277        | -3.696        | 37.526        |
|           | Grad-CAM++          | 19.779        | 14.901       | 4.879         | 7.165         | 44.16         |         | Grad-CAM++          | 20.927        | 10.394       | 10.533        | 12.468        | 45.072        |
|           | XGrad-CAM           | 19.804        | 13.162       | 6.642         | 7.649         | 46.257        |         | XGrad-CAM           | 18.142        | 9.216        | 8.926         | 12.036        | 53.162        |
|           | Eigen-CAM           | 47.725        | 8.716        | 39.009        | 26.380        | <u>54.459</u> |         | Eigen-CAM           | 42.230        | 7.276        | <u>34.954</u> | 25.417        | 40.761        |
|           | Layer-CAM           | 45.826        | <u>7.660</u> | 38.166        | 26.864        | 52.579        |         | Layer-CAM           | 39.160        | <b>5.882</b> | 33.278        | 25.656        | 51.396        |
|           | CAMERAS             | 47.048        | <b>7.314</b> | 38.332        | <u>27.236</u> | 51.852        |         | CAMERAS             | 39.994        | 6.972        | 33.022        | <u>26.008</u> | <u>51.398</u> |
|           | Relevance-CAM       | 48.854        | 8.949        | <u>39.909</u> | 26.734        | 47.163        |         | Relevance-CAM       | 32.180        | 8.487        | 23.693        | 19.995        | 46.068        |
|           | <b>Holistic-CAM</b> | <b>53.825</b> | 10.912       | <b>42.913</b> | <b>27.650</b> | <b>55.745</b> |         | <b>Holistic-CAM</b> | <b>45.001</b> | <u>6.969</u> | <b>38.032</b> | <b>26.252</b> | <b>58.155</b> |
| Layer1    | Grad-CAM            | 18.448        | 17.177       | 1.271         | 2.801         | 45.095        | Layer13 | Grad-CAM            | 10.181        | 10.523       | -0.342        | 0.581         | 42.653        |
|           | Grad-CAM++          | 16.903        | 18.089       | -1.186        | 1.513         | 43.631        |         | Grad-CAM++          | 18.429        | 10.293       | 8.136         | 12.764        | 45.531        |
|           | Layer-CAM           | 35.491        | <u>6.803</u> | 28.688        | 23.347        | 50.925        |         | Layer-CAM           | 35.638        | <u>6.032</u> | 29.606        | 26.597        | 51.759        |
|           | XGrad-CAM           | 19.621        | 16.642       | 2.979         | 3.539         | 45.158        |         | XGrad-CAM           | 14.480        | 8.690        | 5.79          | 11.918        | 43.796        |
|           | Eigen-CAM           | 38.471        | 7.277        | 31.194        | 22.692        | <u>51.651</u> |         | Eigen-CAM           | <u>40.353</u> | 8.596        | <u>31.757</u> | 23.911        | <u>53.966</u> |
|           | CAMERAS             | 36.306        | <b>6.373</b> | 29.933        | 22.628        | 50.101        |         | CAMERAS             | 36.561        | <b>5.746</b> | 30.815        | <b>27.724</b> | 51.336        |
|           | Relevance-CAM       | 46.255        | 10.291       | <u>35.964</u> | <u>24.297</u> | 47.591        |         | Relevance-CAM       | 27.971        | 10.883       | 17.088        | 18.015        | 45.987        |
|           | <b>Holistic-CAM</b> | <b>52.639</b> | 10.899       | <b>41.740</b> | <b>25.439</b> | <b>52.278</b> |         | <b>Holistic-CAM</b> | <b>45.776</b> | 8.604        | <b>37.172</b> | <u>26.771</u> | <b>56.467</b> |
|           |                     |               |              |               |               |               | Layer3  | Grad-CAM            | 8.881         | 13.876       | -4.995        | -5.311        | 43.577        |
|           |                     |               |              |               |               |               |         | Grad-CAM++          | 22.878        | 12.535       | 10.343        | 14.299        | 45.665        |
|           |                     |               |              |               |               |               |         | Layer-CAM           | 29.993        | <u>5.552</u> | 24.441        | <u>29.554</u> | 51.551        |
|           |                     |               |              |               |               |               |         | XGrad-CAM           | 15.356        | 12.227       | 3.129         | 10.231        | 44.705        |
|           |                     |               |              |               |               |               |         | Eigen-CAM           | 39.355        | 8.625        | <u>30.730</u> | 23.038        | <u>53.697</u> |
|           |                     |               |              |               |               |               |         | CAMERAS             | 25.284        | <b>5.365</b> | 19.919        | <b>30.215</b> | 50.611        |
|           |                     |               |              |               |               |               |         | Relevance-CAM       | <u>37.937</u> | 12.928       | 25.009        | 16.335        | 46.206        |
|           |                     |               |              |               |               |               |         | <b>Holistic-CAM</b> | <b>48.231</b> | 9.292        | <b>38.939</b> | 28.365        | <b>54.596</b> |

A.3 Comparisons of Various Attribution Methods.

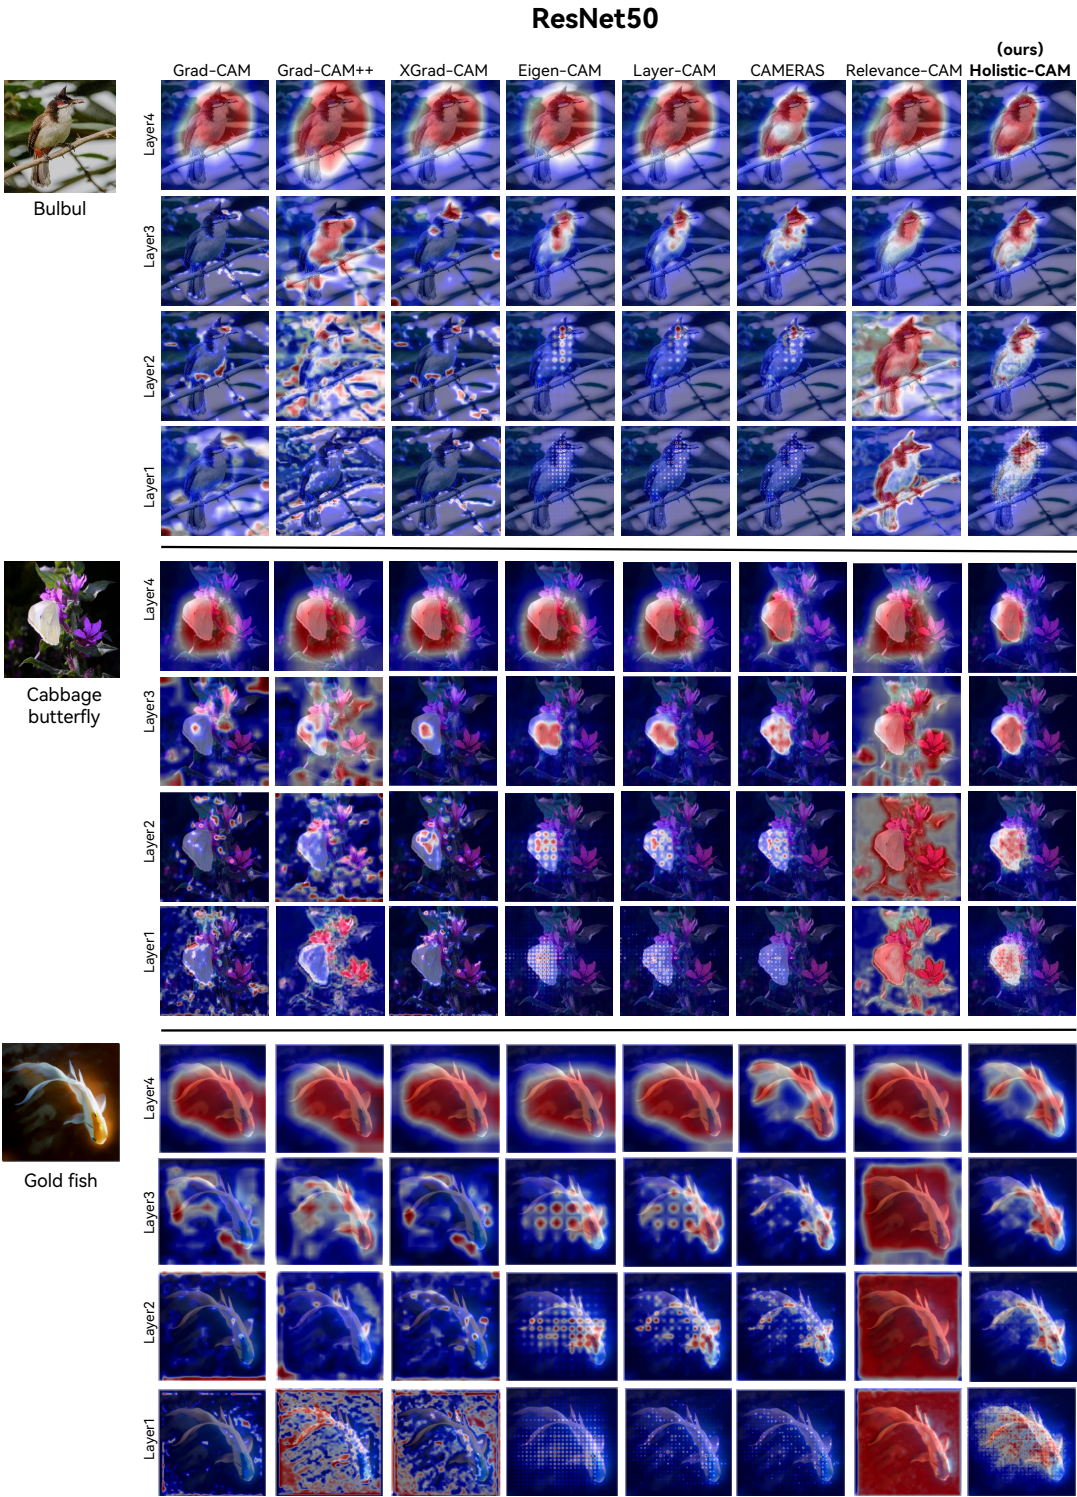

**Fig 1. Comparisons of Various Attribution Methods.** The columns are divided by the interpretation methods. The rows are divided along layer depth. Layer1 to Layer4 represent the four stages of ResNet-50 from shallow to deep, respectively. **Holistic-CAM** is capable of locating the target object accurately.



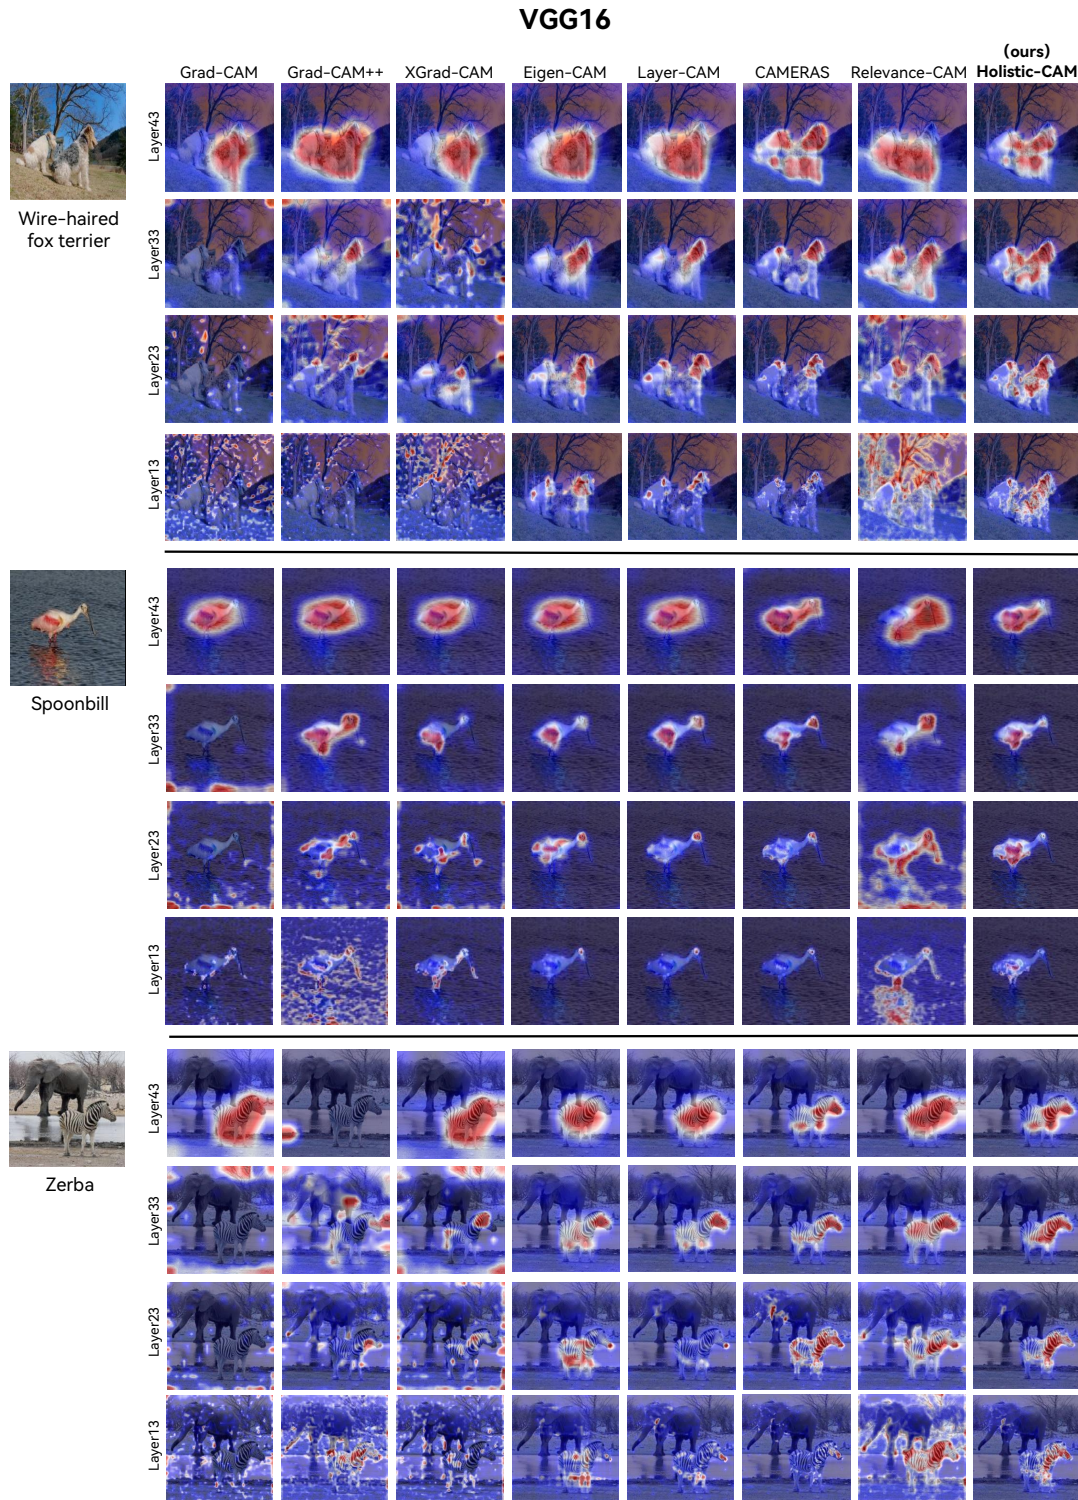

**Fig 2. Comparisons of Various Attribution Methods.** The columns are divided by the interpretation methods. The rows are divided along layer depth. Layer43 to Layer13 represents the four max-pooling layers of VGG-16 from shallow to deep, respectively.
